# Supplementary material for: Ligand efficacy modulates conformational dynamics of the µ-opioid receptor
Source: PubMed Central journal article supplement (PMC11078757; doi:10.1038/s41586-024-07295-2), 2024-04-10
Supplement: 41586_2024_7295_MOESM1_ESM.pdf [file 41586_2024_7295_MOESM1_ESM.pdf]

---

**Supplementary information**

---

**Ligand efficacy modulates conformational dynamics of the  $\mu$ -opioid receptor**

---

In the format provided by the authors and unedited

## Supplementary information for

### Ligand efficacy modulates conformational dynamics of the $\mu$ -opioid receptor

**Authors:** Jiawei Zhao<sup>1,2†</sup>, Matthias Elgeti<sup>3,4†\*</sup>, Evan S. O'Brien<sup>5</sup>, Cecília P. Sár<sup>6</sup>, Amal EI Daibani<sup>7</sup>, Jie Heng<sup>1,2</sup>, Xiaou Sun<sup>1,2</sup>, Elizabeth White<sup>5</sup>, Tao Che<sup>7</sup>, Wayne L. Hubbell<sup>3</sup>, Brian K. Kobilka<sup>5\*</sup>, Chunlai Chen<sup>1,8\*</sup>

#### Affiliations:

<sup>1</sup>State Key Laboratory of Membrane Biology, Beijing Advanced Innovation Center for Structural Biology, Tsinghua University; Beijing, 100084, China.

<sup>2</sup>Tsinghua-Peking Joint Center for Life Sciences, School of Medicine, Tsinghua University; Beijing, 100084, China.

<sup>3</sup>Jules Stein Eye Institute and Department of Chemistry and Biochemistry, University of California; Los Angeles, Los Angeles, CA 90095, USA.

<sup>4</sup>Institute for Drug Discovery, University of Leipzig Medical Center; 04107 Leipzig, Germany.

<sup>5</sup>Department of Molecular and Cellular Physiology, Stanford University School of Medicine; Stanford, CA 94305, USA.

<sup>6</sup>Institute of Organic and Medicinal Chemistry, School of Pharmaceutical Sciences, University of Pécs; Szigeti st. 12, H-7624 Pécs, Hungary.

<sup>7</sup>Department of Anesthesiology, Washington University School of Medicine; Saint Louis, MO 63110, USA

<sup>8</sup>School of Life Sciences, Tsinghua University; Beijing, 100084, China.

†These authors contributed equally to this work.

\*Corresponding author. Email: matthias.elgeti@uni-leipzig.de (M.E.); kobilka@stanford.edu (B.K.K.); chunlai@mail.tsinghua.edu.cn (C.C.)

**Table of contents**

Supplementary Fig. 1. Ligands used in this study. .... 3

Supplementary Fig. 2. Synthesis of HO-1427. .... 4

Supplementary Fig. 3. DEER dipolar evolution data and 6-Gaussian model-based fits. .... 5

Supplementary Fig. 4. Representative fluorescence traces of Cy3 and Cy5 labeled  $\mu\text{OR}\Delta 7$ -182C/273C ( $\mu\text{OR}$ -Cy3/Cy5). .... 6

Supplementary Fig. 5. Exemplary smFRET traces and transitions of  $\mu\text{OR}$ -Cy3/Cy5 in the presence of 20  $\mu\text{M}$  with different GDP concentrations. .... 7

Supplementary Fig. 6. Fitting high-FRET dwell time. .... 8

Supplementary Fig. 7. Fitting low-FRET dwell time.. .... 9

Supplementary Fig. 8. The raw, uncropped gel images for Extended Data Fig. 3a ..... 10

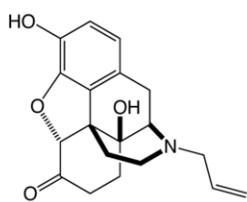

Naloxone

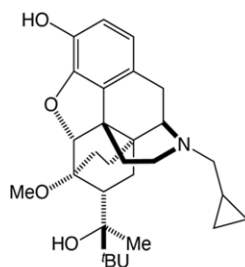

Buprenorphine

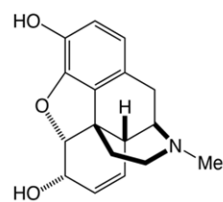

Morphine

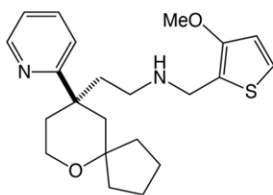

TRV130

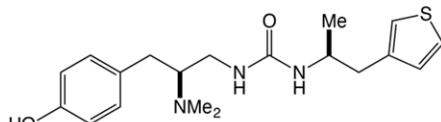

PZM21

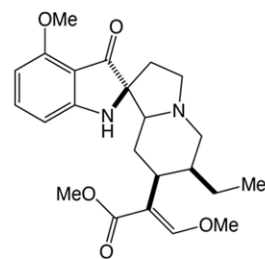

Mitragynine pseudoindoxyl (MP)

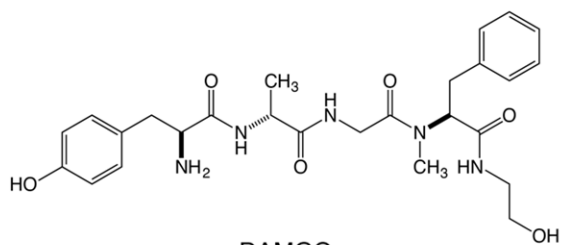

DAMGO  
(H-Tyr-D-Ala-Gly-N-MePhe-Gly-ol)

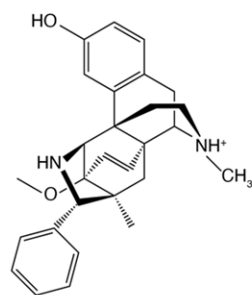

BU72

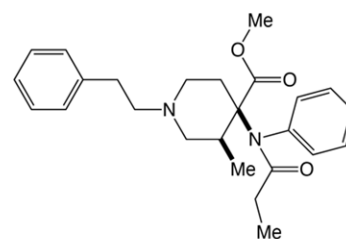

Lofentanil

**Supplementary Fig. 1. Ligands used in this study.**

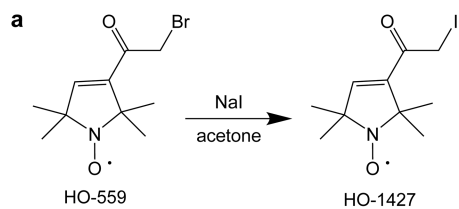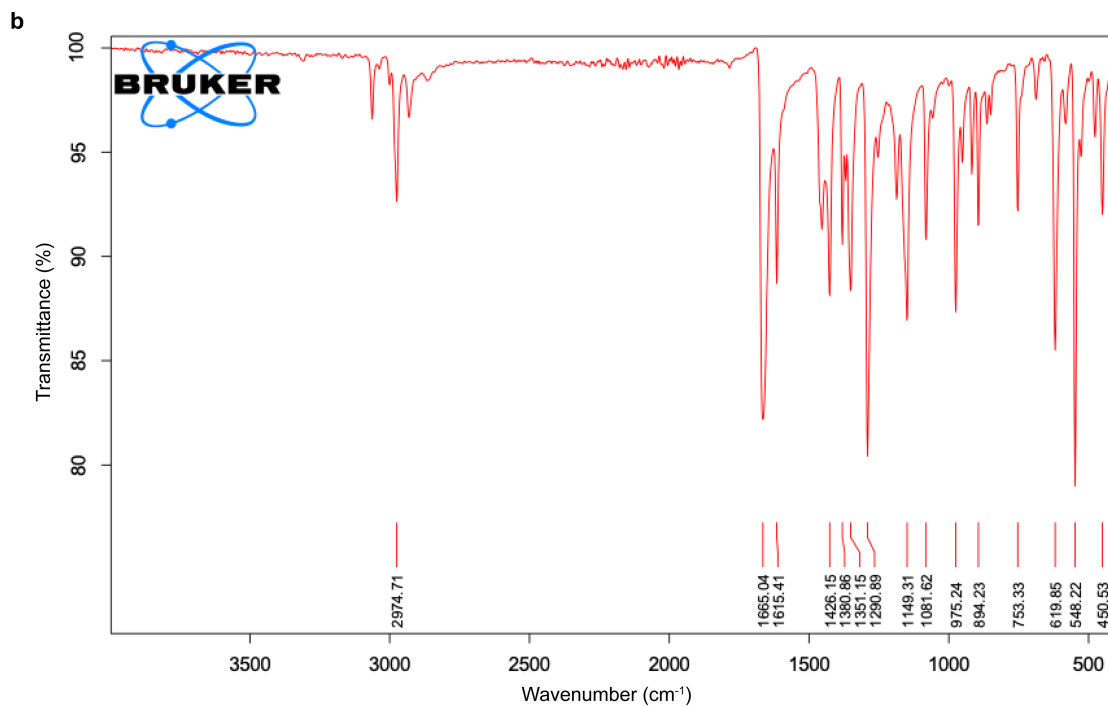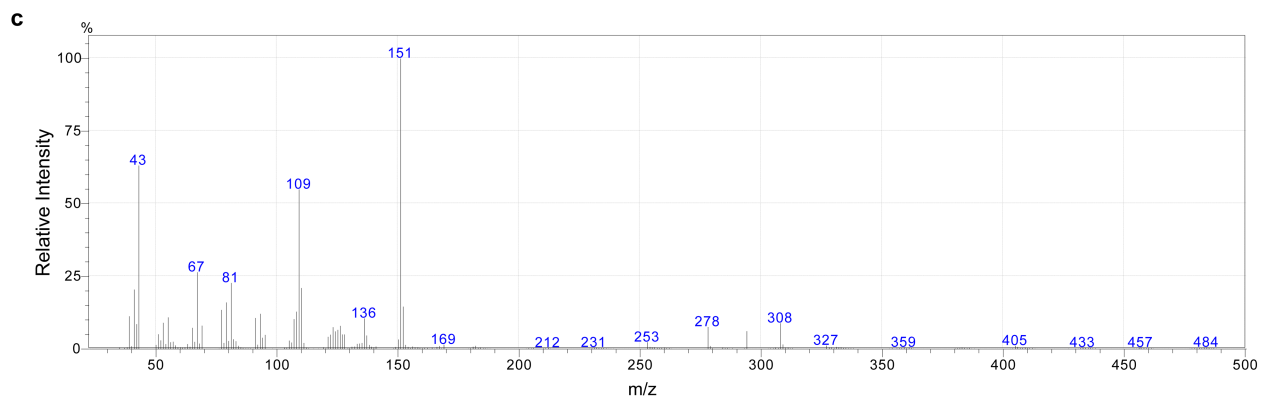

**Supplementary Fig. 2. Synthesis of HO-1427. a,** Schematic of HO-1427 synthesis. **b,** Fourier-transform infrared spectroscopy (FTIR) of HO-1427. **c,** Mass spectrum of HO-1427.

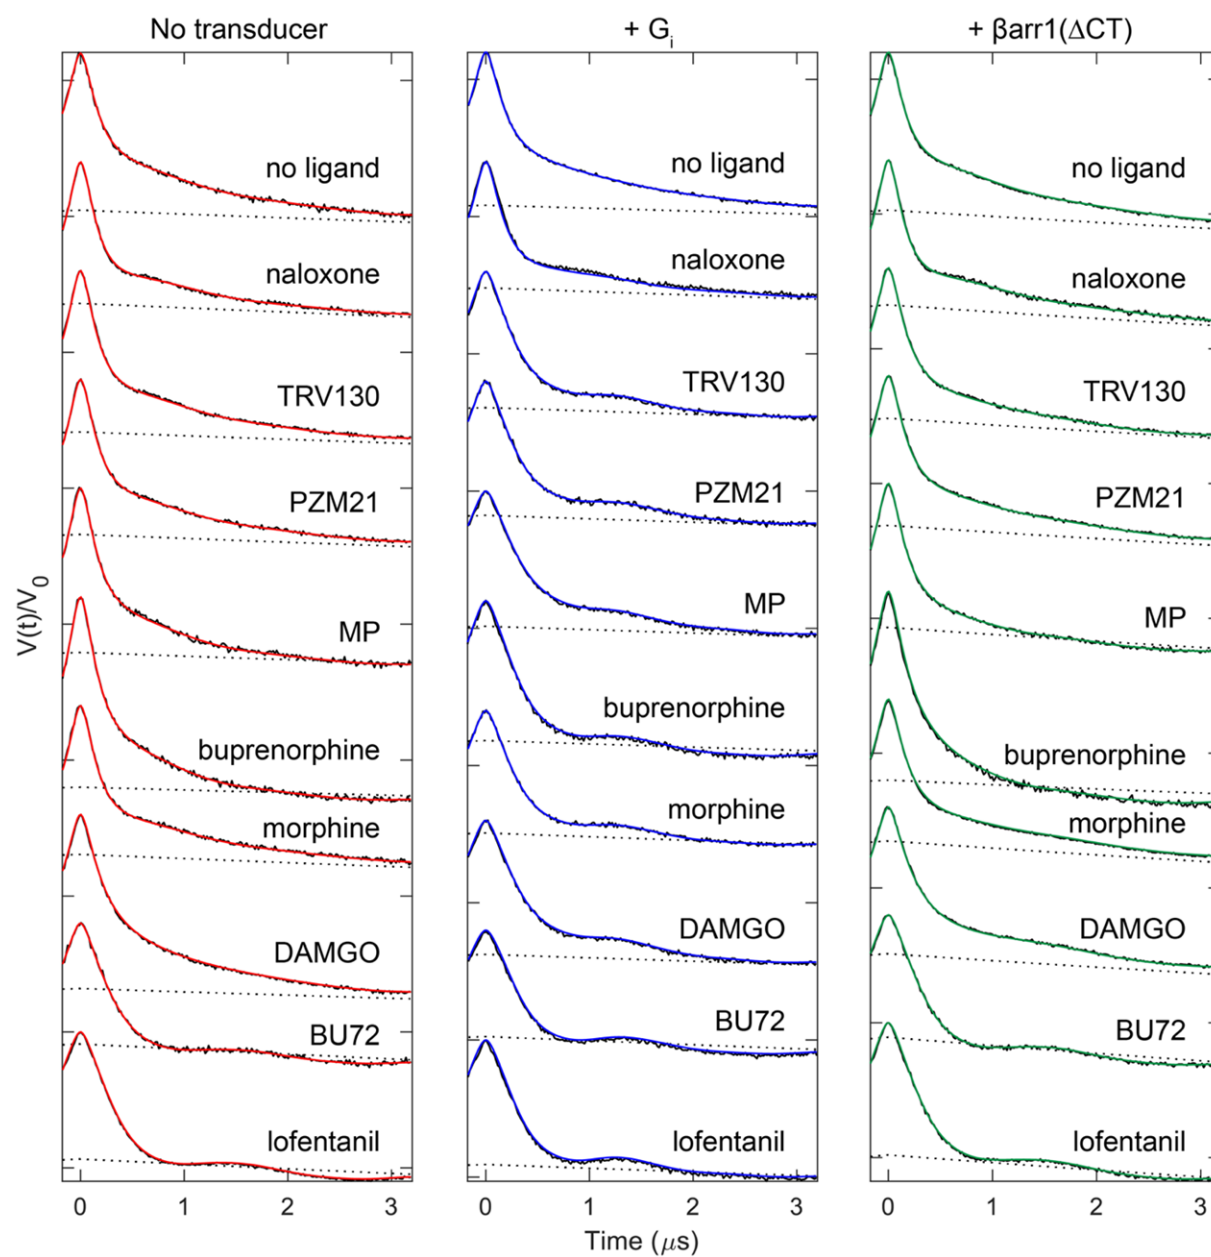

**Supplementary Fig. 3. DEER dipolar evolution data and 6-Gaussian model-based fits.**  
Dotted lines indicate background signal.

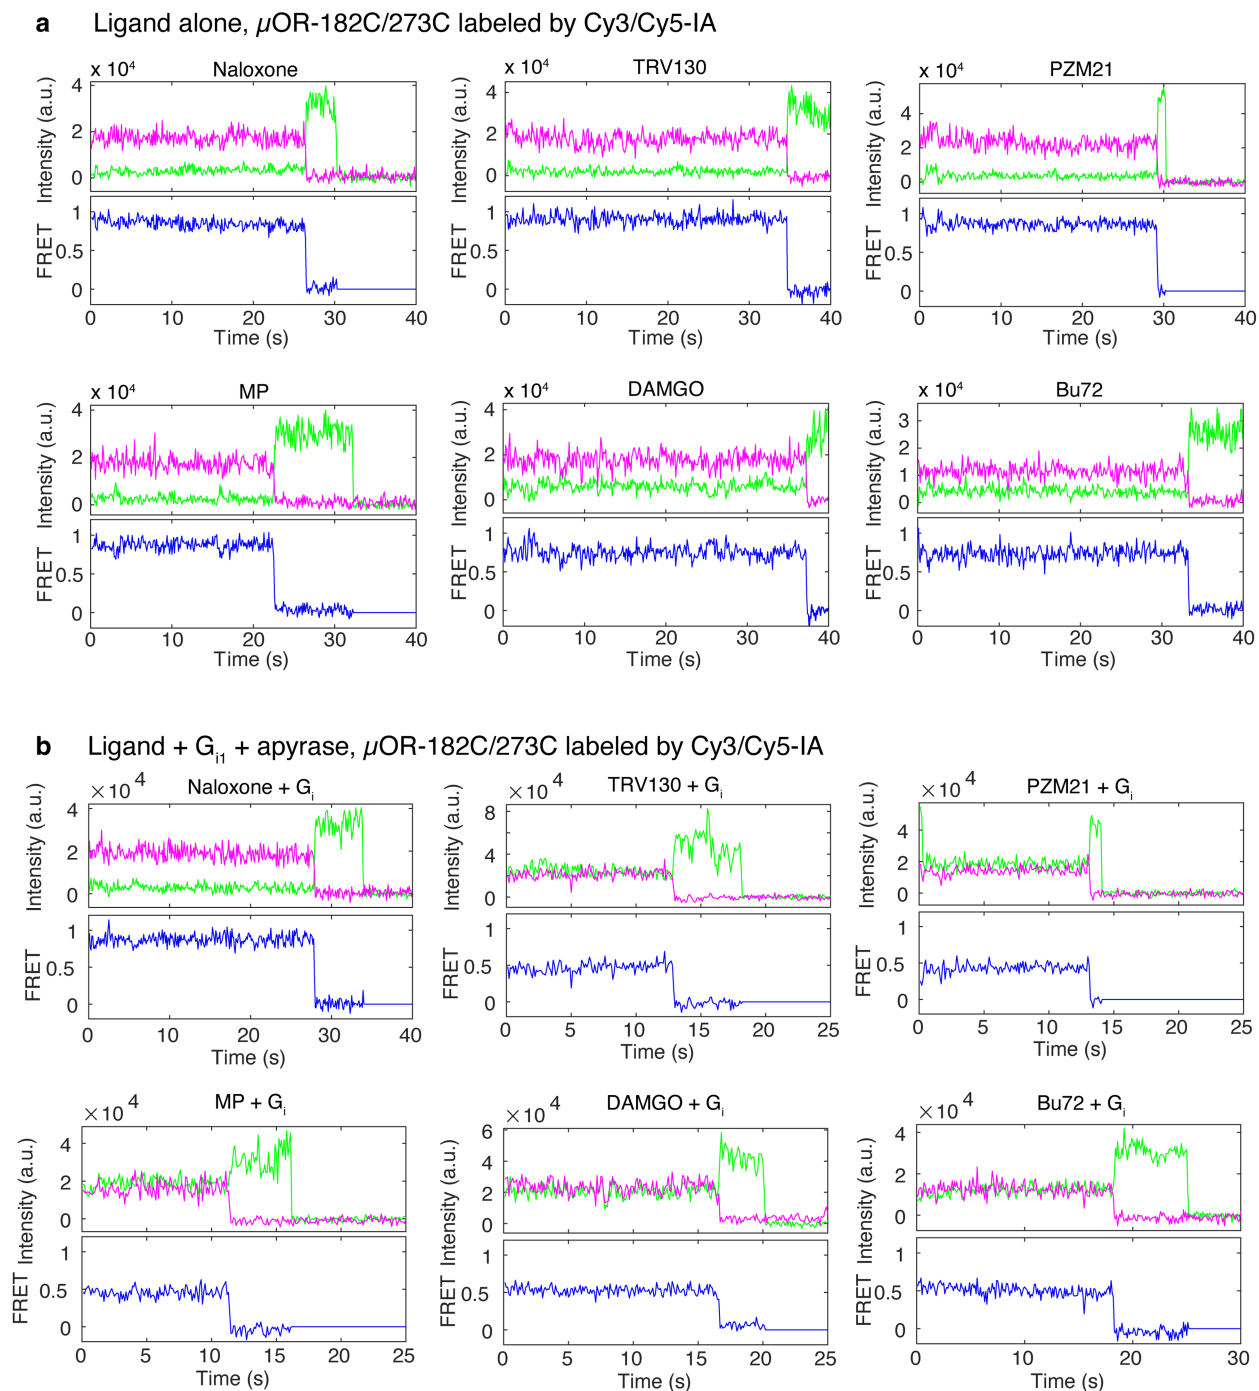

**Supplementary Fig. 4. Representative fluorescence traces of Cy3 and Cy5 labeled  $\mu\text{OR}\Delta 7\text{-182C/273C}$  ( $\mu\text{OR-Cy3/Cy5}$ ).** **a**, Fluorescence traces of  $\mu\text{OR-Cy3/Cy5}$  in the presence of saturating ligands (related to Fig. 3b). **b**, Fluorescence traces of  $\mu\text{OR-Cy3/Cy5}$  in the presence of saturating ligands and  $G_i$ , which were treated with apyrase to remove free GDP (related to Fig. 4a).

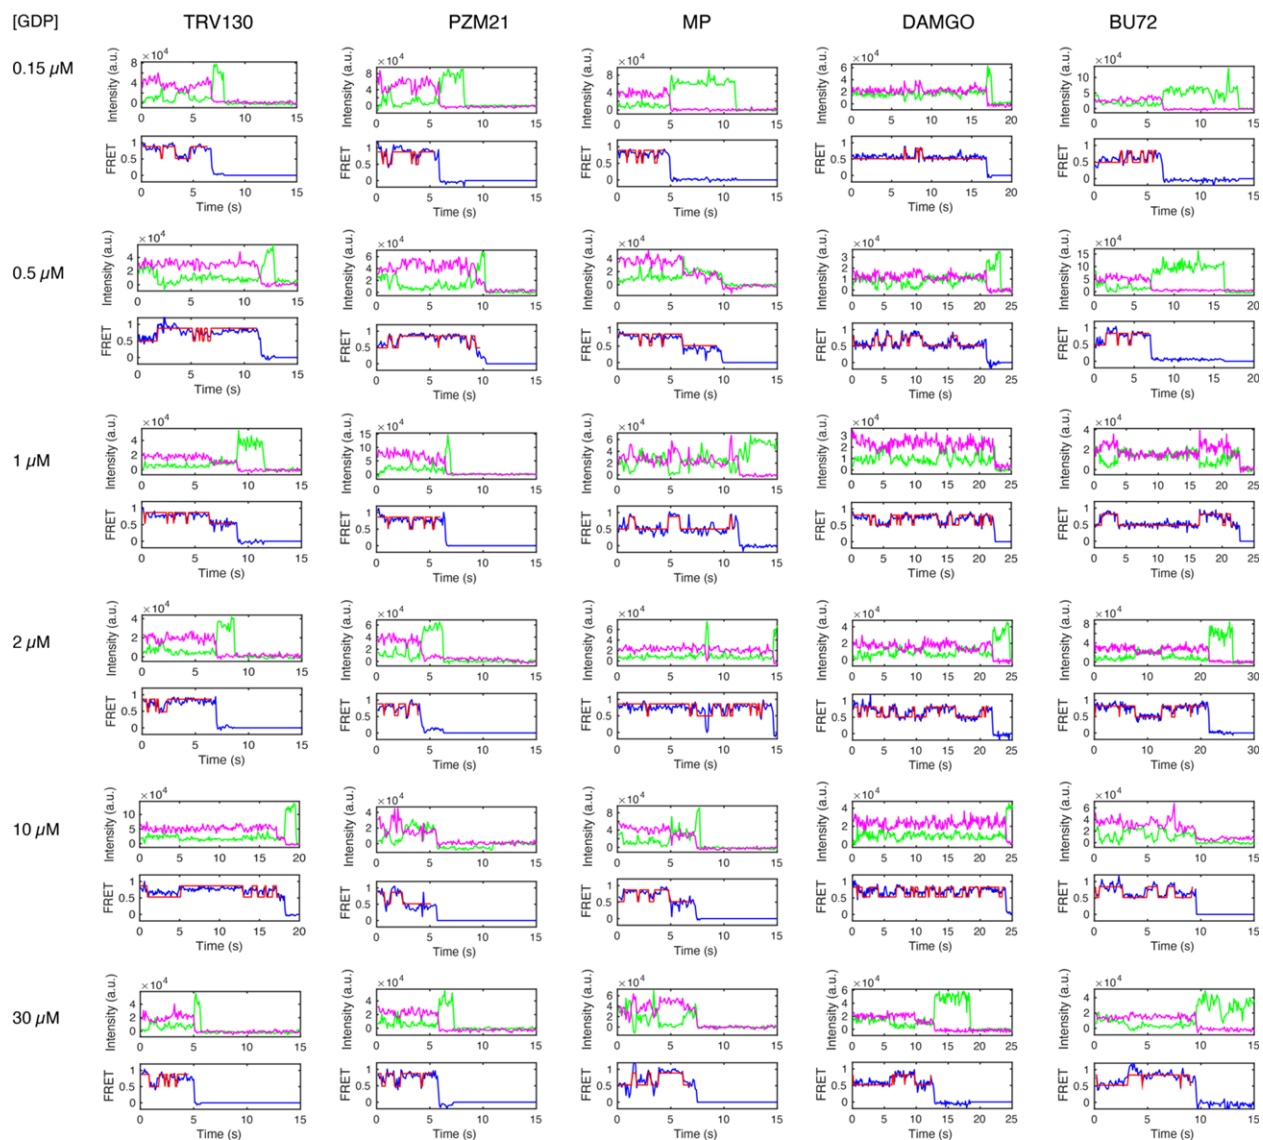

**Supplementary Fig. 5. Exemplary smFRET traces and transitions of  $\mu\text{OR}$ -Cy3/Cy5 in the presence of 20  $\mu\text{M}$  with different GDP concentrations.**



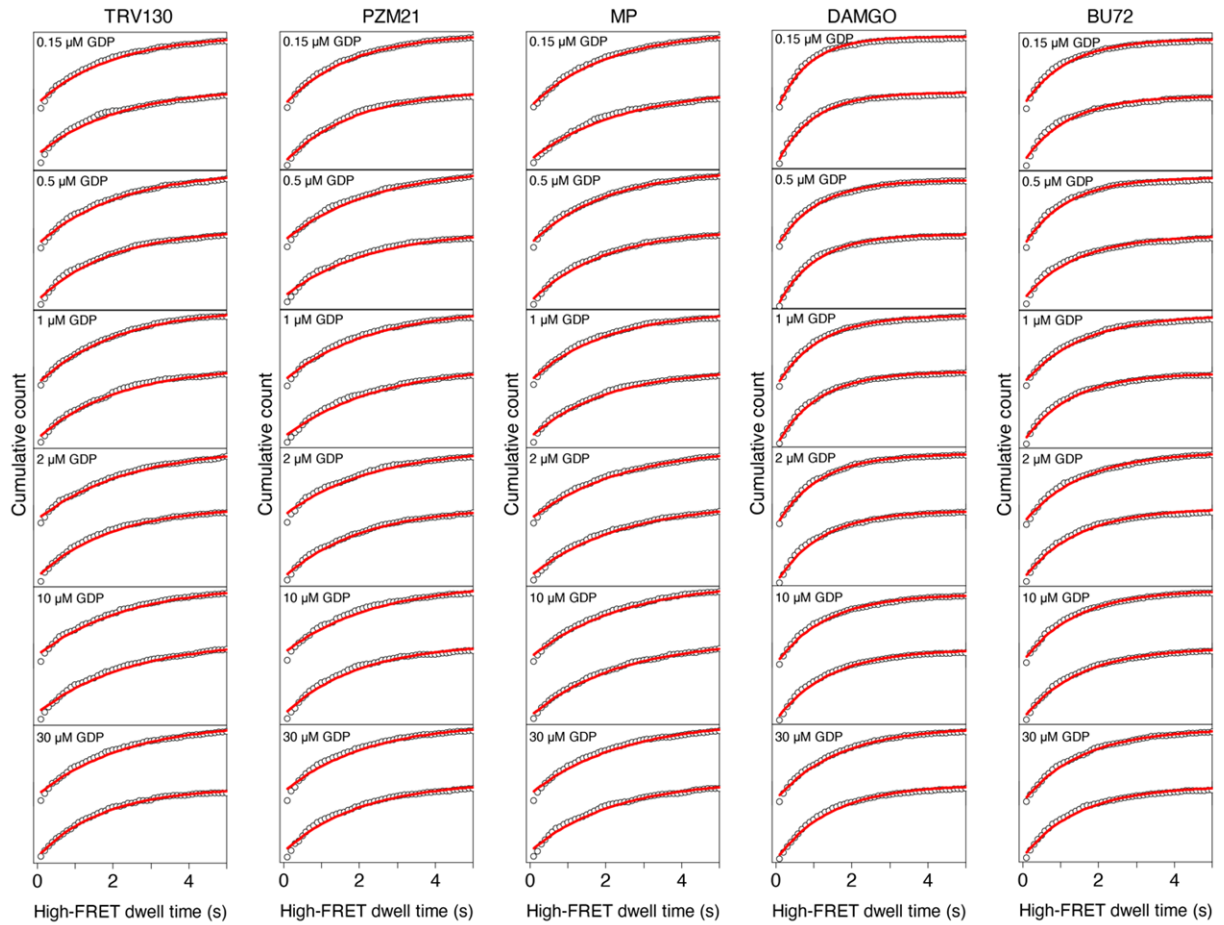

**Supplementary Fig. 6. Fitting high-FRET dwell time.** Cumulative counts are shown as black circles. High-FRET dwell times are fitted in single exponential decays (solid lines in red). There are two repeats for each condition.

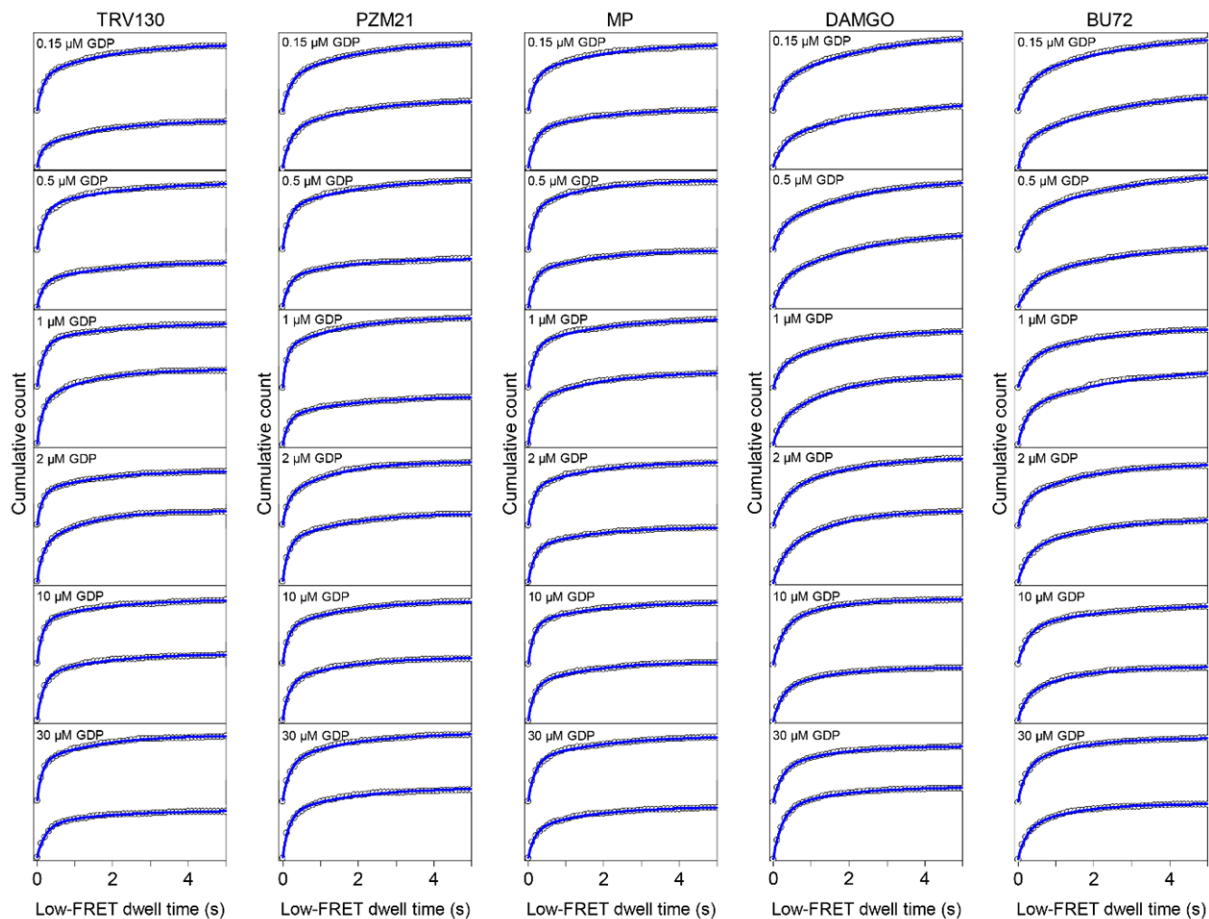

**Supplementary Fig. 7. Fitting low-FRET dwell time.** Cumulative counts of low-FRET dwell time for each condition are shown as black circles. Low-FRET dwell times are fitted in double exponential decays (solid lines in blue). There are two repeats for each condition.

Coomassie Brilliant Blue staining

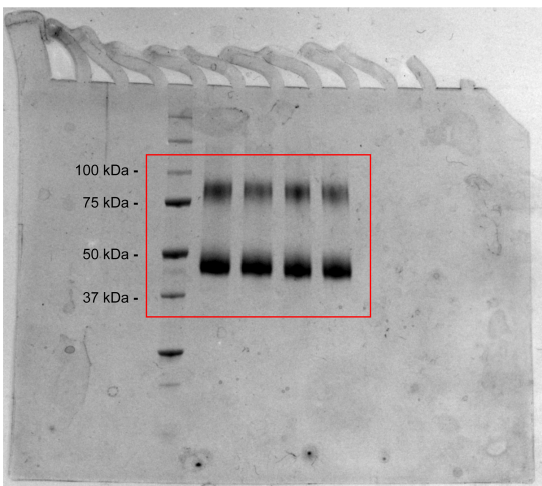

ATTO 488 Fluorescence

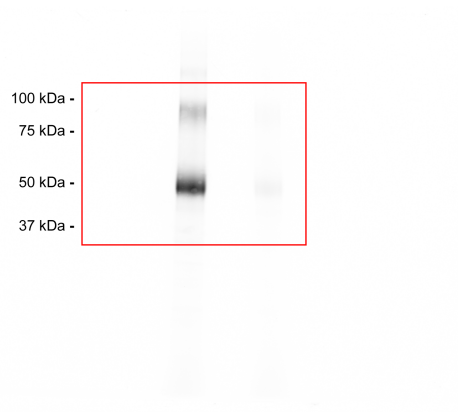

**Supplementary Fig. 8. The raw, uncropped gel images for Extended Data Fig. 3a. Regions shown in Extended Data Fig. 3a are marked by red rectangles.**
